# Supplementary material for: Changes in the Prevalence of Metabolic Syndrome, Its Components, and Relevant Preventive Medication between 2011 and 2018 in the Northeast Hungarian Roma Population
Source: MDPI journal article supplement (doi:10.3390/jpm11070595), 2021-06-24
Supplement: s1 [file s1]

**Supplementary Table S2.** Biochemical, physical parameters and frequency of preventive medication used to estimate the prevalence of metabolic syndrome in the study populations by sex.

| A                                            | Male                            |                                 |                 | Female                          |                                 |                  |
|----------------------------------------------|---------------------------------|---------------------------------|-----------------|---------------------------------|---------------------------------|------------------|
|                                              | Sample of 2011<br>Mean (95% CI) | Sample of 2018<br>Mean (95% CI) | <i>p</i> -Value | Sample of 2011<br>Mean (95% CI) | Sample of 2018<br>Mean (95% CI) | <i>p</i> -value  |
| Fasting glucose (mmol/L)                     | <b>6.1 (5.6-6.5)</b>            | <b>5.3 (4.9-5.7)</b>            | <b>0.002</b>    | <b>5.3 (5.1-5.5)</b>            | <b>5.0 (4.9-5.2)</b>            | <b>&lt;0.001</b> |
| Fasting TG (mmol/L)                          | 1.8 (1.6-2.1)                   | 1.9 (1.7-2.1)                   | 0.406           | 1.5 (1.4-1.6)                   | 1.5 (1.4-1.7)                   | 0.384            |
| HDL-C (mmol/L)                               | 1.2 (1.1-1.2)                   | 1.2 (1.1-1.3)                   | 0.225           | 1.2 (1.2-1.3)                   | 1.3 (1.2-1.3)                   | 0.146            |
| Waist circumference (cm)                     | 94.7 (91.8-97.6)                | 97.6 (94.0-101.2)               | 0.185           | <b>89.1 (87.3-91.0)</b>         | <b>93.8 (91.9-95.8)</b>         | <b>0.001</b>     |
| Systolic blood pressure (mmHg)               | 131.7 (127.9-135.5)             | 128.4 (125.0-131.9)             | 0.328           | 124.4 (122.4-126.5)             | 121.3 (119.3-123.3)             | 0.072            |
| Diastolic blood pressure (mmHg)              | 80.7 (78.9-82.4)                | 81.0 (78.9-83.1)                | 0.600           | <b>78.0 (77.0-79.1)</b>         | <b>79.6 (78.4-80.8)</b>         | <b>0.026</b>     |
| B                                            | Prevalence in %<br>(95% CI)     | Prevalence in %<br>(95% CI)     | <i>p</i> -Value | Prevalence in %<br>(95% CI)     | Prevalence in %<br>(95% CI)     | <i>p</i> -value  |
| Prevalence of antihypertensive treatment (%) | 30.7 (23.2-39.1)                | 36.1 (27.0-45.9)                | 0.397           | 30.2 (25.5-35.3)                | 30.0 (24.8-35.5)                | 0.947            |
| Prevalence of antidiabetic treatment (%)     | 11.0 (6.5-17.3)                 | 10.3 (5.4-17.5)                 | 0.864           | <b>5.1 (3.1-7.9)</b>            | <b>11.6 (8.2-15.7)</b>          | <b>0.004</b>     |
| Prevalence of lipid lowering therapy (%)     | 16.5 (10.9-23.7)                | 13.4 (7.7-21.2)                 | 0.517           | 9.1 (6.3-12.5)                  | 9.7 (6.7-13.7)                  | 0.773            |

Significant differences in mean or prevalence rates are highlighted in **bold**. 95% CI: 95% confidence interval. TG: triglyceride; HDL-C: high-density lipoprotein cholesterol.
