# Supplementary material for: Changes in the Prevalence of Metabolic Syndrome, Its Components, and Relevant Preventive Medication between 2011 and 2018 in the Northeast Hungarian Roma Population
Source: MDPI journal article supplement (doi:10.3390/jpm11070595), 2021-06-24
Supplement: s1 [file s1]

**Supplementary Table S1** Main demographic characteristics of the study populations.

|             |        | Sample of 2011         | Sample of 2018         | <i>p</i> -value |
|-------------|--------|------------------------|------------------------|-----------------|
|             |        | Prevalence in %<br>(n) | Prevalence in %<br>(n) |                 |
| Sex         | Male   | 27.7 (127)             | 25.9 (97)              | 0.562           |
|             | Female | 72.3 (331)             | 74.1 (277)             |                 |
| Age groups  | 20-34  | 28.6 (131)             | 29.1 (109)             | 0.974           |
|             | 35-49  | 39.5 (181)             | 38.8 (145)             |                 |
|             | 50-64  | 31.9 (146)             | 32.1 (120)             |                 |
|             |        | Mean (95% CI)          | Mean (95% CI)          | <i>p</i> -value |
| Age (years) |        | 42.6 (41.6-43.7)       | 42.6 (41.3-43.8)       | 0.927           |

95% CI: 95% confidence interval.
